# Supplementary material for: Evaluating the ecological hypothesis: Early life salivary microbiome assembly predicts dental caries in a longitudinal case-control study
Source: Research Square preprint supplement (doi:10.21203/rs.3.rs-848589/v1), 2022-02-15
Supplement: Supplementary file 1 [file 3f8fe1fdf9202a5aebda7a89.xlsx]

## Sheet: asv14
asv

## Sheet: asv8
asv

## Sheet: asv82
asv
