# Supplementary material for: Evaluating the ecological hypothesis: Early life salivary microbiome assembly predicts dental caries in a longitudinal case-control study
Source: Research Square preprint supplement (doi:10.21203/rs.3.rs-848589/v1), 2022-02-15
Supplement: Supplementary file 2 [file 5d447d4ec407ef453507f307.xlsx]

## Sheet: Sheet 1
cohort
