# Supplementary material for: Evaluating the ecological hypothesis: Early life salivary microbiome assembly predicts dental caries in a longitudinal case-control study
Source: Research Square preprint supplement (doi:10.21203/rs.3.rs-848589/v1), 2022-02-15
Supplement: Supplementary file 3 [file a94e6df6f73f96b365b00250.xlsx]

## Sheet: Sheet 1
SampleType
